# Supplementary material for: Chitosan grafted onto Fe3O4@poly(N-vinylcaprolactam) as a new sorbent for detecting Imatinib mesylate in biosamples using UPLC-MS/MS
Source: Royal Society of Chemistry journal article supplement (doi:10.1039/c9an01654f), 2019-01-01
Supplement: c9an01654f1.pdf [file c9an01654f1.pdf]

# 1 **Supplementary Information**

2 **Chitosan Grafted onto Fe<sub>3</sub>O<sub>4</sub>@poly(N-Vinylcaprolactam) as New Sorbent for Detection**

3 **Imatinib mesylate in Biosamples Using UPLC-MS/MS**

4 Hamed Sahebi <sup>a</sup>, Seied Mahdi Pourmortazavi <sup>\*b</sup>, Hamed Zandavar <sup>b</sup>, Somayeh Mirsadeghi <sup>\*c</sup>

---

\* Address correspondence to: P.O. Box 1411713137, Tehran, Iran, Somayeh Mirsadeghi; Email address: [sshmirsadeghi@sina.tums.ac.ir](mailto:sshmirsadeghi@sina.tums.ac.ir),  
Seied Mahdi Pourmortazavi: ([pourmortazavi@mut.ac.ir](mailto:pourmortazavi@mut.ac.ir)/ [pourmortazavi@yahoo.com](mailto:pourmortazavi@yahoo.com))

5  
6  
7  
8  
9  
10  
11  
12  
13  
14  
15  
16  
17  
18  
19  
20  
21  
22  
23  
24  
25

<sup>a</sup>Department of Chemistry, Faculty of Science, Islamic Azad University Central Tehran Branch,  
Tehran, Iran

<sup>b</sup>Faculty of Chemistry and Chemical Engineering, Malek Ashtar University of Technology, Tehran, Iran

<sup>c</sup>Endocrinology and Metabolism Research Center, Endocrinology and Metabolism Clinical Sciences Institute,  
Tehran University of Medical Sciences, 1411713137, Tehran, Iran

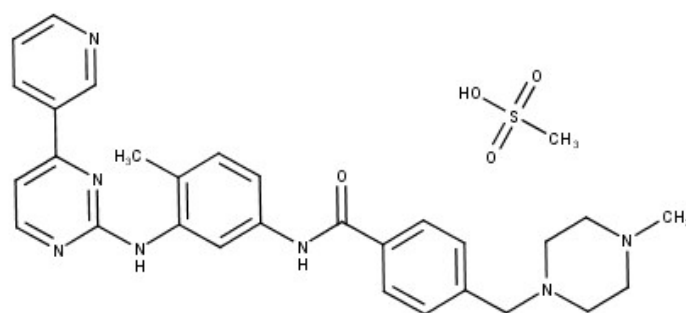

26  
27

**Fig. S1** Structure of IMM.

28

29

30

31

32

33

34

35

36

37

38

39

40

a)

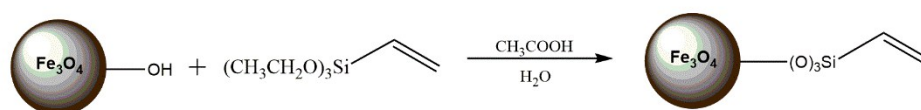

b)

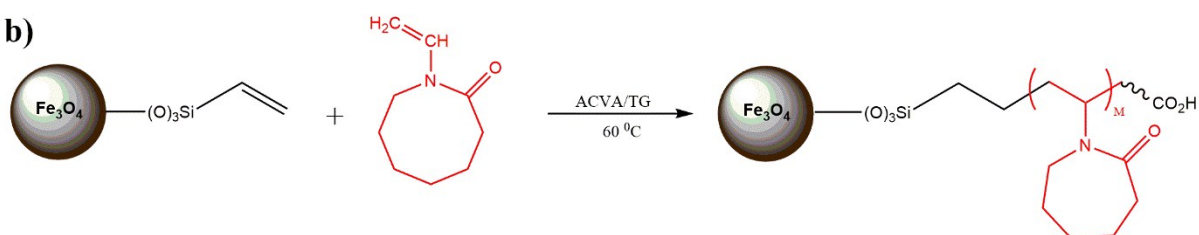

41

42 **Fig. S2** a) Schematic pathway for synthesis of Fe<sub>3</sub>O<sub>4</sub> NPs coated VTMS; b) Synthesis of  
43 Fe<sub>3</sub>O<sub>4</sub> @PNVCL-COOH NPs.

44

45

46

47

48

49

50

51

52

53

54

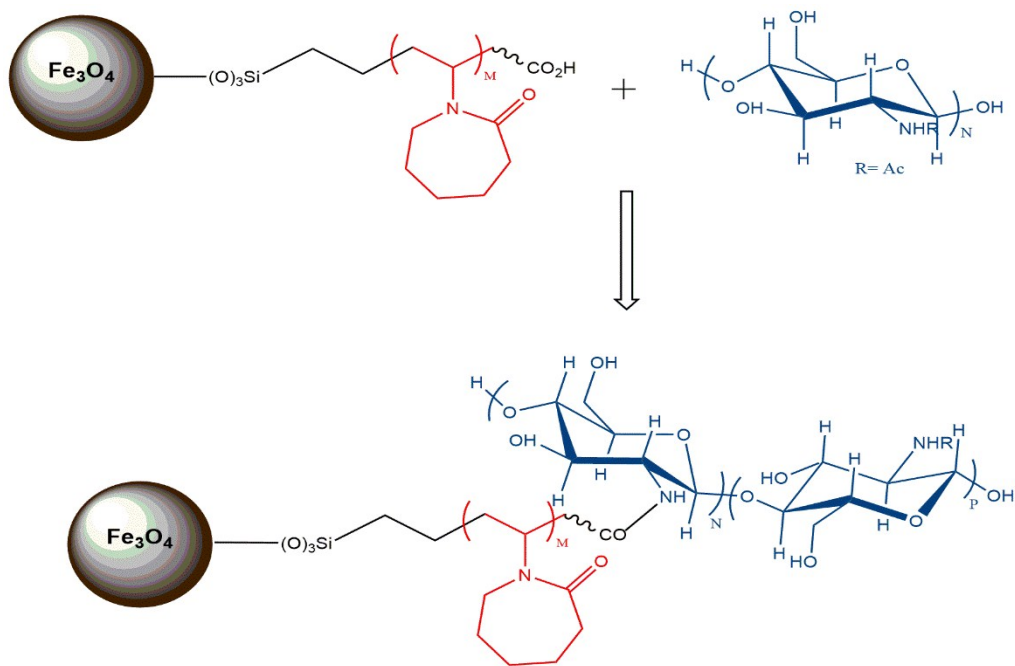

55

56 **Fig. S3** Schematic pathway synthesis of chitosan-grafted onto  $\text{Fe}_3\text{O}_4$ @PNVCL-COOH NPs.

57

58

59

60

61

62

63

64

65

66

67

68

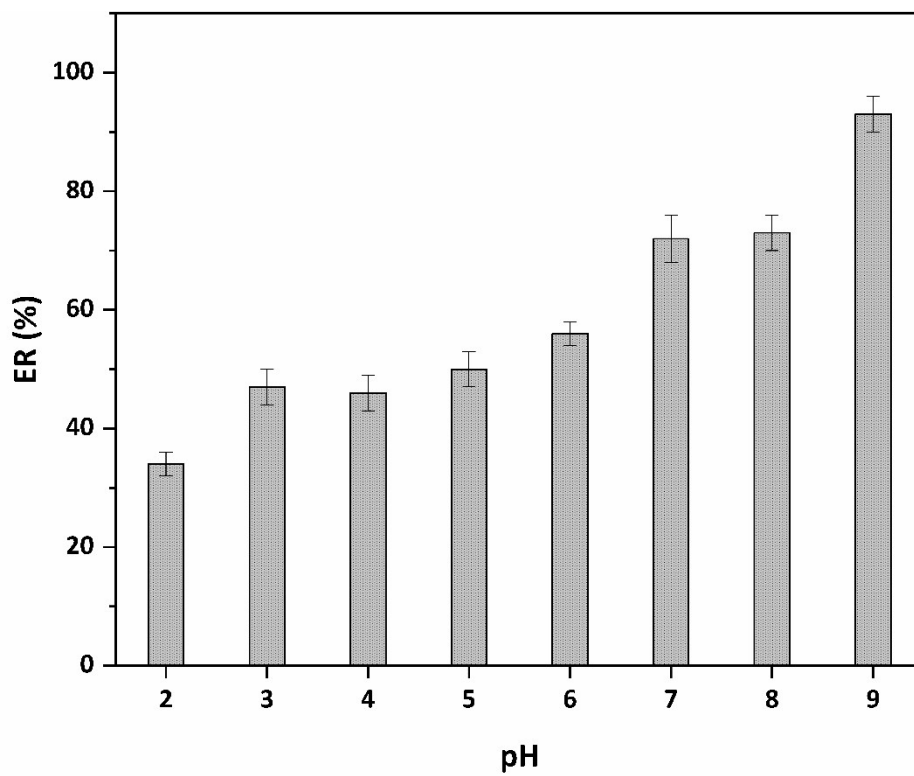

69

70

**Fig. S4** Effect of pH values on ER.

71

72

73

74

75

76

77

78

79

80

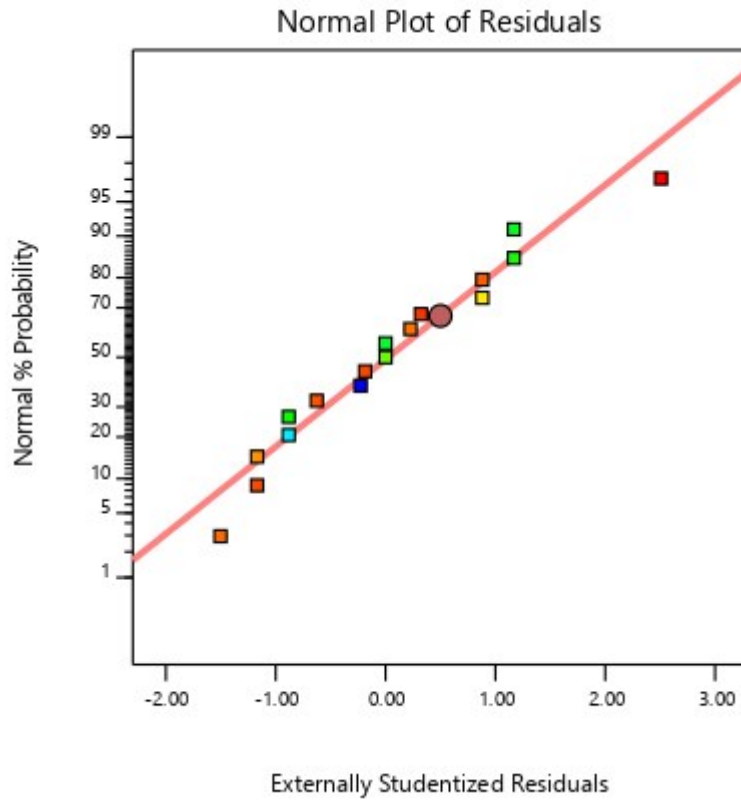

81

82

**Fig. S5** Normal probability plot.

83

84

85

86

87

88

89

90

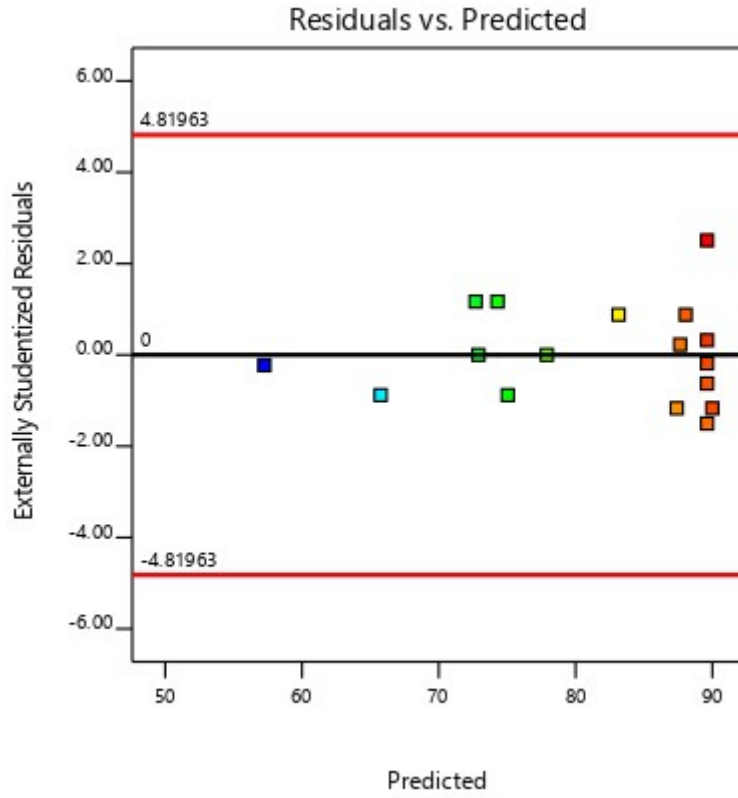

91

92

**Fig.S6** The plot of studentized residuals.

93

94

95

96

97

98

99

100

101

102

103

104

105



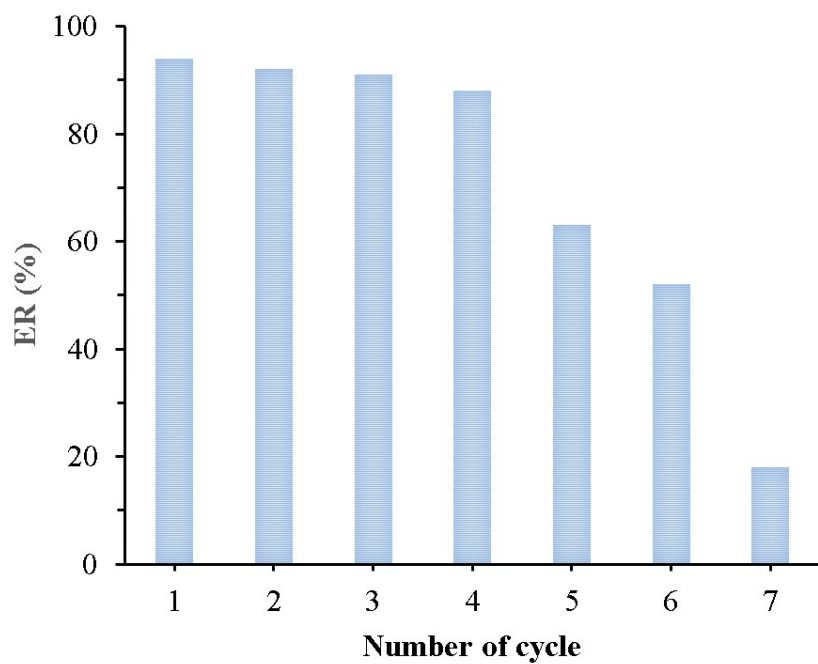

106  
107  
108  
109  
110  
111  
112  
113  
114  
115  
116  
117  
118  
119  
120  
121  
122

**Fig. S7** Reusability of adsorbent.

**Table S1**MS/MS parameters of the IMM and IS.

| <b>Analyte</b> | <b>Precursor ion (m/z)</b> | <b>Product ion (m/z)</b>    | <b>Dwell time (s)</b> | <b>Collision energy (V)</b> | <b>Cone voltage (V)</b> |
|----------------|----------------------------|-----------------------------|-----------------------|-----------------------------|-------------------------|
| IMM            | 494.1                      | 217.14, 393.82 <sup>a</sup> | 0.10, 0.10            | 12, 24                      | 58                      |
| SLZ (IS)       | 253.93                     | 108.07, 155.41 <sup>a</sup> | 0.10, 0.10            | 8, 14                       | 35                      |

123 a: Ion for quantification.

124
